# Supplementary material for: Erk regulation of actin capping and bundling by Eps8 promotes cortex tension and leader bleb-based migration
Source: eLife. 2015 Jul 11;4:e08314. doi: 10.7554/eLife.08314 (PMC4522647; doi:10.7554/eLife.08314)
Supplement: Supplementary file 1. — Quantitative and statistical analyses of leader bleb area, cortex tension and intracellular pressure for each condition in A375 cells. (Sheets 1–6) Quantitative and statistical analyses of leader bleb area (Sheets 1 and 2, expressed in μm2) cortex tension (Sheets 3 and 5, expressed in pN/µm) and intracellular pressure (Sheets 4 and 6, expressed in Pa) for human melanoma A375 cells treated with non-targeting siRNA (non-targeting) or depleted of Eps8 using an siRNA specific for human Eps8 (hEps8 siRNA), rescued with or over-expressing (OE) Emerald-tagged wild type mouse Eps8 (mEps8 WT) or the following mutants: mEps8 Δbund (bundling defective, L757A/K759A), mEps8 Δcap (capping defective, V689D/L693D) and mEps8 SATA (Erk phosphorylation deficient, S624A/T628A), or EGFP-tagged human α-actinin, or treated with 50 µM blebbistatin to inhibit myosin II or 10 µM U0126 to inhibit MEK/Erk. (Sheets 1, 2) Cells were confined between uncoated glass and an agar pad, leader bleb area is expressed as percent of cell body area. In (Sheet 1), cells were depleted of Eps8 and rescued with WT and mutants of Eps8, in (Sheet 2), cells were over-expressing WT or mutant Eps8. (Sheets 3–6) Cells were plated on uncoated glass, and where noted, treated with 50 µM blebbistatin (5 min) to inhibit myosin II or 10 µM U0126 (30 min) prior to atomic force microscopy analysis. (Sheets 3, 5) Cortex tension (expressed in pN/µm) in cells (Sheet 3) depleted of and rescued with WT Eps8, or (Sheet 5) over-expressing WT Eps8 or mutants. (Sheets 4, 6) Intracellular pressure (expressed in Pa) in cells (Sheet 4) depleted of and rescued with WT Eps8, or (Sheet 6) over-expressing WT Eps8 and mutants. DOI: http://dx.doi.org/10.7554/eLife.08314.032 [file elife08314s001.xls]

## Sheet: (A) Leader bleb area
Statistics	Non-targeting	hEps8 siRNA	hEps8 siRNA + mEps8 WT	hEps8 siRNA + mEps8 Δbund	hEps8 siRNA + α-actinin	hEps8 siRNA + mEps8 Δcap	hEps8 siRNA + mEps8 SATA
Number of values	144	168	206	131	113	144	144
Minimum	3.299	0.1721	0.01955	0.2229	1.61	2.976	0.6922
25% Percentile	6.786	1.972	8.061	1.14	4.376	9.87	3.622
Median	10.06	4.675	10.39	4.939	7.865	15.07	5.869
75% Percentile	18.24	10.92	15.43	8.946	13.3	20.69	7.88
Maximum	47.47	35.7	47.94	26.74	37.3	60.54	23.46
Mean (% of cell body area)	12.99	7.795	12.87	6.136	9.837	17.36	6.318
Std. Deviation	8.582	7.699	8.16	5.724	7.313	10.88	3.968
Std. Error of Mean	0.7152	0.594	0.5685	0.5001	0.6879	0.9064	0.3306

## Sheet: (B) Leader bleb area
Statistics	Eps8 WT OE	Eps8 Δbund OE	α-actinin OE	Eps8 Δcap OE	Eps8 SATA OE
Number of values	144	120	112	137	110
Minimum	5.472	0.4113	8.038	5.971	0.7466
25% Percentile	10.8	1.509	14.7	13.34	2.276
Median	15.79	2.421	19.82	18.42	3.406
75% Percentile	23.72	5.839	30.3	28.14	4.407
Maximum	67.57	16.16	79.74	90.25	12.58
Mean (% of cell body area)	19.5	4.063	24.09	23.68	3.667
Std. Deviation	12.44	3.8	13.65	15.91	1.994
Std. Error of Mean	1.037	0.3469	1.29	1.359	0.1901

## Sheet: (C) Cortex tension
Statistics	Untreated	Blebbistatin	Non-targeting	hEps8 siRNA	hEps8 siRNA + mEps8
Number of values	140	12	13	20	16
Minimum	620	672	1164	771.2	1394
25% Percentile	1440	784	1459	1137	1411
Median	1529	1035	1579	1216	1538
75% Percentile	1601	1189	1692	1318	1576
Maximum	2440	1395	2351	1493	1635
Mean (pN/µm)	1513	1017	1594	1207	1513
Std. Deviation	217.7	232.2	287.9	188.2	85.24
Std. Error of Mean	18.4	67.04	79.86	42.09	21.31

## Sheet: (D) Pressure
Statistics	Untreated	Blebbistatin	Non-targeting	hEps8 siRNA	hEps8 siRNA + mEps8
Number of values	140	12	13	20	16
Minimum	200	176.9	337.3	220.5	389.4
25% Percentile	381.8	227.3	380.6	280.4	406.3
Median	424.6	313.8	419.8	353.5	435.3
75% Percentile	463.3	345.8	439.9	391.1	466.2
Maximum	739.4	398.6	691.4	426.4	527.5
Mean (Pa)	421.2	291.9	428.2	338.7	437.3
Std. Deviation	72.53	74.87	85.87	59.84	38.93
Std. Error of Mean	6.13	21.61	23.82	13.38	9.731

## Sheet: (E) Cortex tension
Statistics	Eps8 WT OE	Eps8 Δbund OE	α-actinin OE	Eps8 Δcap OE	Eps8 SATA OE	U01262
Number of values	15	21	25	29	30	32
Minimum	1136	671	1586	1490	627	653
25% Percentile	1225	990	1848	1720	788.8	946.3
Median	1320	1155	1985	1875	995.5	1061
75% Percentile	1565	1254	2128	2037	1107	1234
Maximum	1977	1710	2350	2473	1493	1737
Mean (pN/µm)	1403	1156	1999	1895	976.7	1099
Std. Deviation	246.5	225.8	203.7	222	195.4	231.7
Std. Error of Mean	63.65	49.27	40.75	41.23	35.67	40.95

## Sheet: (F) Pressure
Statistics	Eps8 WT OE	Eps8 Δbund OE	α-actinin OE	Eps8 Δcap OE	Eps8 SATA OE	U0126
Number of values	15	21	25	29	30	32
Minimum	272.1	176.7	452.9	419.9	181	210.7
25% Percentile	314.4	254.1	536.9	459.7	246.5	240.7
Median	374.3	320.4	627.2	499.7	276.2	282.8
75% Percentile	420.6	354.9	658.4	560.6	313.9	364.7
Maximum	581.4	481	854.2	668.4	414.8	496.6
Mean (Pa)	386.6	315.3	610.2	513.2	277.6	305.8
Std. Deviation	84.7	79.58	91.63	67.91	56.16	75.48
Std. Error of Mean	21.87	17.37	18.33	12.61	10.25	13.34
